# Supplementary material for: Novel fluorine-containing X-branched oligophenylenes: structure–hole blocking property relationships
Source: Royal Society of Chemistry journal article supplement (doi:10.1039/b512517k), 2005-12-14
Supplement: b512517k.pdf [file b512517k.pdf]

## Synthetic Procedures and Structural Characterization Data of Novel Fluorine-Containing X-Branched Oligophenylenes

**1,2,4,5-Tetra(4'-fluorobiphenyl-1'-yl)benzene (X-OPP(5)-F<sub>1</sub>).** A mixture of 1,2,4,5-tetra-(4'-iodophenyl)benzene **1** (443 mg, 0.5 mmol), 4-fluorophenylboronic acid (420 mg, 3 mmol), 1 : 2 palladium(II) acetate–triphenylphosphine (5 mol%), toluene (20 mL), methanol (10 mL) and 2 M K<sub>2</sub>CO<sub>3</sub> (6 mL) under nitrogen atmosphere was heated at 75 °C for 4 h with magnetic stirring. After the reaction mixture was cooled to room temperature, it was poured into water and extracted with dichloromethane (3 × 50 mL). The combined organic layer was dried with anhydrous Na<sub>2</sub>SO<sub>4</sub> and evaporated to dryness. The crude product was first purified by silica-gel column chromatography with 6 : 1 petroleum ether–dichloromethane as eluent and then by sublimation method affording a white solid with an isolated yield of 83 %. <sup>1</sup>H NMR (400 MHz, CDCl<sub>3</sub>, δ) 7.62 (s, 2 H), 7.55 (d, *J* = 8.8 Hz, 4 H), 7.54 (d, *J* = 8.8 Hz, 4 H), 7.46 (d, *J* = 8.4 Hz, 8 H), 7.33 (d, *J* = 8.8 Hz, 8 H), 7.10 (t, *J* = 8.8 Hz, 8 H). <sup>13</sup>C NMR (100 MHz, CDCl<sub>3</sub>, δ) 163.7, 161.2, 139.8, 139.2, 138.5, 136.6, 133.1, 130.3, 128.5, 128.4, 126.6, 115.7, 115.5. MS (FAB) *m/z* 759.6 (M<sup>+</sup>+1). Anal. calcd for C<sub>54</sub>H<sub>34</sub>F<sub>4</sub>: C, 85.47; H, 4.52. Found: C, 85.67; H, 4.49%.

**1,2,4,5-Tetra[4'-(3',5'-difluorophenyl)phenyl-1'-yl]benzene (X-OPP(5)-F<sub>2</sub>).** The Suzuki cross-coupling procedure described above was followed using **1** (886 mg, 1 mmol) and 3,5-difluorophenylboronic acid (883 mg, 6 mmol). The crude product was first purified by silica-gel column chromatography with 6 : 1 petroleum ether–dichloromethane as eluent and then

by sublimation affording a white solid with an isolated yield of 54%.  $^1\text{H}$  NMR (400 MHz,  $\text{CDCl}_3$ ,  $\delta$ ) 7.61 (s, 2 H), 7.46 (d,  $J = 8.0$  Hz, 8 H), 7.34 (d,  $J = 8.0$  Hz, 8 H), 7.07–7.12 (m, 8 H), 6.73–6.79 (m, 4 H).  $^{13}\text{C}$  NMR (100 MHz,  $\text{CDCl}_3$ ,  $\delta$ ) 164.6, 164.5, 162.1, 162.0, 143.9, 143.8, 143.7, 140.8, 139.2, 137.3, 133.1, 130.5, 126.7, 109.9, 109.8, 109.7, 109.6, 102.8, 102.6, 102.3. MS (FAB)  $m/z$  830.6 ( $\text{M}^+$ ). Anal. calcd for  $\text{C}_{54}\text{H}_{30}\text{F}_8$ : C, 78.07; H, 3.64. Found: C, 77.86; H, 3.72%.

**1,2,4,5-Tetra[4'-(3',4',5'-trifluorophenyl)phenyl-1'-yl]benzene (X-OPP(5)-F<sub>3</sub>).** The Suzuki cross-coupling procedure described above was followed using **1** (0.89 g, 1 mmol) and 3,4,5-trifluorophenylboronic acid (1.06 g, 6 mmol). The crude product was first purified by silica-gel column chromatography with 6 : 1 petroleum ether–dichloromethane as eluent and then by sublimation affording a white solid with an isolated yield of 61%.  $^1\text{H}$  NMR (400 MHz,  $\text{CDCl}_3$ ,  $\delta$ ) 7.63 (s, 2 H), 7.42 (d,  $J = 8.4$  Hz, 8 H), 7.36 (d,  $J = 8.4$  Hz, 8 H), 7.11–7.18 (m, 4 H), 6.98–7.05 (m, 4 H).  $^{13}\text{C}$  NMR (100 MHz,  $\text{CDCl}_3$ ,  $\delta$ ) 140.5, 139.2, 133.1, 132.6, 130.1, 128.5, 128.4, 123.8, 123.7, 123.6, 123.5, 125.4, 112.3, 112.2, 112.0, 111.9. MS (FAB)  $m/z$  902.8 ( $\text{M}^+$ ). Anal. calcd for  $\text{C}_{54}\text{H}_{26}\text{F}_{12}$ : C, 71.84; H, 2.90. Found: C, 71.68; H, 2.95%.

**1,2,4,5-Tetra(4'-trifluoromethylbiphenyl-1'-yl)benzene (X-OPP(5)-CF<sub>3</sub>).** The Suzuki cross-coupling procedure described above was followed using **1** (0.89 g, 1 mmol) and 4-trifluoromethylphenylboronic acid (1.14 g, 6 mmol). The crude product was first purified by silica-gel column chromatography with 6 : 1 petroleum ether–dichloromethane as eluent and then by sublimation affording a white solid with an isolated yield of 58%.  $^1\text{H}$  NMR (400 MHz,  $\text{CDCl}_3$ ,  $\delta$ ) 7.68 (d,  $J = 4.0$  Hz, 16 H), 7.65 (s, 2 H), 7.53 (d,  $J = 8.4$  Hz, 8 H), 7.38 (d,  $J = 8.4$  Hz, 8 H).  $^{13}\text{C}$  NMR (100 MHz,  $\text{CDCl}_3$ ,  $\delta$ ) 144.5, 140.7, 139.5, 138.1, 133.1, 130.5,

127.2, 127.1, 127.0, 125.8, 109.5. MS (FAB)  $m/z$  958.8 ( $M^+$ ). Anal. calcd for  $C_{58}H_{34}F_{12}$ : C, 72.66; H, 3.57. Found: C, 72.60; H, 3.70%.

**1,2,4,5-Tetra(4,4'-biphenyl-1-yl)benzene (X-OPP(5)-H).** The Suzuki cross-coupling procedure described above was followed using **1** (886 mg, 1 mmol) and phenylboronic acid (732 mg, 6 mmol). The crude product was first purified by silica-gel column chromatography with 6 : 1 petroleum ether–dichloromethane as eluent and then by sublimation affording a white solid with an isolated yield of 66 %.  $^1H$  NMR (400 MHz,  $CDCl_3$ ,  $\delta$ ) 7.65 (s, 2 H), 7.58–7.61 (m, 8 H), 7.51 (d,  $J = 8.4$  Hz, 8 H), 7.41 (dd,  $J = 7.6$  Hz, 8 H), 7.35 (d,  $J = 8.4$  Hz, 8 H), 7.31 (dd,  $J = 7.6$  Hz, 4 H). MS (FAB)  $m/z$  686.6 ( $M^+$ ). Anal. calcd for  $C_{54}H_{38}$ : C, 94.42; H, 5.58. Found: C, 94.55; H, 5.70%.

**1,2,4,5-Tetra(3',5'-difluorophenyl)benzene (X-OPP(3)-F<sub>2</sub>).** The Suzuki cross-coupling procedure described above was followed using 1,2,4,5-tetrabromobenzene (787 mg, 2 mmol) and 3,5-difluorophenylboronic acid (883 mg, 6 mmol). The crude product was first purified by silica-gel column chromatography with 10 : 1 petroleum ether–dichloromethane as eluent and then by sublimation affording a white solid with an isolated yield of 75 %.  $^1H$  NMR (400 MHz,  $CDCl_3$ ,  $\delta$ ) 7.42 (s, 2 H), 6.69–6.77 (m, 12 H).  $^{13}C$  NMR (100 MHz,  $CDCl_3$ ,  $\delta$ ) 164.1, 163.9, 161.6, 161.5, 142.8, 142.7, 142.6, 138.5, 132.5, 112.7, 112.6, 112.5, 112.4, 103.4, 103.1, 102.9. MS (FAB)  $m/z$  526.9 ( $M^+$ ). Anal. calcd for  $C_{30}H_{14}F_8$ : C, 68.39; H, 2.68. Found: C, 68.45; H, 2.80%.
